# Supplementary material
Source: PubMed Central journal article supplement (PMC3769477)
Supplement: NIHMS498774-supplement-01.pdf [file NIHMS498774-supplement-01.pdf]

**Supplemental Table 1. Summary of the allele and genotype frequency comparisons in the Brazilian cohort.**

| Genetic Markers   | Alleles (%) |           | <i>p</i> -value | OR (95%C.I.)        | Genotypes (%) |           |           | <i>p</i> -value |
|-------------------|-------------|-----------|-----------------|---------------------|---------------|-----------|-----------|-----------------|
| <b>TUFT1</b>      |             |           |                 |                     |               |           |           |                 |
| <b>rs2337360</b>  | <b>A</b>    | <b>G</b>  |                 |                     | <b>AA</b>     | <b>AG</b> | <b>GG</b> |                 |
| MIH               | 52(36.6)    | 90(63.4)  | 0.11            | 1.48<br>(0.89-2.47) | 9(12.7)       | 34(47.9)  | 28(39.4)  | 0.23            |
| No MIH            | 46(28.5)    | 118(71.5) |                 |                     | 5(6.1)        | 36(43.9)  | 41(50.0)  |                 |
| <b>rs4970957</b>  | <b>A</b>    | <b>G</b>  |                 |                     | <b>AA</b>     | <b>AG</b> | <b>GG</b> |                 |
| MIH               | 108(76.1)   | 34(23.9)  | 0.87            | 0.95<br>(0.6-1.8)   | 44(62.0)      | 20(28.2)  | 7(9.9)    | 0.5             |
| No MIH            | 134(75.3)   | 44(24.7)  |                 |                     | 51(57.3)      | 32(36.0)  | 6(6.7)    |                 |
| <b>rs3790506</b>  | <b>A</b>    | <b>G</b>  |                 |                     | <b>AA</b>     | <b>AG</b> | <b>GG</b> |                 |
| MIH               | 41(28.8)    | 101(71.2) | 0.86            | 0.95<br>(0.57-1.60) | 5(7.0)        | 31(43.7)  | 35(49.3)  | 0.54            |
| No MIH            | 53(29.7)    | 125(70.3) |                 |                     | 10(11.2)      | 33(37.1)  | 46(51.7)  |                 |
| <b>AMBN</b>       |             |           |                 |                     |               |           |           |                 |
| <b>rs4694075</b>  | <b>C</b>    | <b>T</b>  |                 |                     | <b>CC</b>     | <b>CT</b> | <b>TT</b> |                 |
| MIH               | 71(42.2)    | 73(57.8)  | 0.06            | 0.65<br>(0.6-1.51)  | 16(22.5)      | 39(54.9)  | 17(22.5)  | 0.78            |
| No MIH            | 90(52.8)    | 88(47.2)  |                 |                     | 23(25.8)      | 44(49.4)  | 22(24.7)  |                 |
| <b>rs496502</b>   | <b>T</b>    | <b>G</b>  |                 |                     | <b>GG</b>     | <b>GT</b> | <b>TT</b> |                 |
| MIH               | 31(23.1)    | 99(76.9)  | 0.65            | 1.13<br>(0.65-2.09) | 38(58.5)      | 23(35.4)  | 4(6.2)    | 0.8             |
| No MIH            | 37(21.0)    | 139(79.0) |                 |                     | 56(63.6)      | 27(30.7)  | 5(5.7)    |                 |
| <b>ENAM</b>       |             |           |                 |                     |               |           |           |                 |
| <b>rs12640848</b> | <b>A</b>    | <b>G</b>  |                 |                     | <b>AA</b>     | <b>AG</b> | <b>GG</b> |                 |
| MIH               | 60(42.3)    | 82(57.7)  | 0.92            | 1.02<br>(0.41-1.04) | 9(12.7)       | 42(59.2)  | 20(28.2)  | 0.05            |
| No MIH            | 93(50.6)    | 83(49.4)  |                 |                     | 25(28.4)      | 43(48.9)  | 20(22.7)  |                 |
| <b>rs3796704</b>  | <b>A</b>    | <b>G</b>  |                 |                     | <b>AA</b>     | <b>AG</b> | <b>GG</b> |                 |
| MIH               | 11(8.0)     | 121(92.0) | 0.02            | 0.42<br>(0.2-0.47)  | 0(0)          | 11(16.7)  | 55(83.3)  | 0.06            |
| No MIH            | 29(17.0)    | 141(83.0) |                 |                     | 5(5.9)        | 19(22.4)  | 61(71.8)  |                 |
| <b>TFIP11</b>     |             |           |                 |                     |               |           |           |                 |
| <b>rs5997096</b>  | <b>C</b>    | <b>T</b>  |                 |                     | <b>CC</b>     | <b>CT</b> | <b>TT</b> |                 |
| MIH               | 54(40.3)    | 80(59.7)  | 0.6             | 0.88<br>(0.55-1.43) | 9(13.4)       | 36(53.7)  | 22(32.8)  | 0.34            |
| No MIH            | 77(43.2)    | 101(56.8) |                 |                     | 19(21.3)      | 39(43.8)  | 31(34.8)  |                 |
| <b>rs134136</b>   | <b>T</b>    | <b>C</b>  |                 |                     | <b>CC</b>     | <b>CT</b> | <b>TT</b> |                 |
| MIH               | 60(42.2)    | 82(57.8)  | 0.14            | 1.40<br>(0.87-2.27) | 26(36.6)      | 30(42.3)  | 15(21.1)  | 0.38            |
| No MIH            | 61(34.2)    | 117(65.8) |                 |                     | 42(47.2)      | 33(37.1)  | 14(15.7)  |                 |
| <b>AMELX</b>      |             |           |                 |                     |               |           |           |                 |
| <b>rs946252</b>   | <b>T</b>    | <b>C</b>  |                 |                     | <b>CC</b>     | <b>CT</b> | <b>TT</b> |                 |
| MIH               | 23(12.6)    | 117(87.4) | 0.46            | 1.38<br>(0.71-2.74) | 52(74.3)      | 13(18.6)  | 5(7.1)    | 0.6             |
| No MIH            | 22(9.4)     | 156(90.6) |                 |                     | 72(80.9)      | 12(13.5)  | 5(5.6)    |                 |
| <b>rs17878486</b> | <b>C</b>    | <b>T</b>  |                 |                     | <b>CC</b>     | <b>CT</b> | <b>TT</b> |                 |
| MIH               | 29(19.2)    | 113(80.8) | 0.11            | 1.86<br>(0.57-1.83) | 10(14.1)      | 9(12.7)   | 52(73.2)  | 0.44            |
| No MIH            | 35(11.3)    | 139(83.7) |                 |                     | 9(10.3)       | 17(19.5)  | 61(70.1)  |                 |

Note: OR (95% C.I.)= Odds ratios (95% confidence intervals)

**Supplemental Table 2. Summary of the allele and genotype frequencies comparisons related to severity of MIH in the Brazilian cohort.**

| Subjects          | Alleles (%) |           | p-value   | OR (95%CI)      | Genotypes (%) |           |           | p-value   |
|-------------------|-------------|-----------|-----------|-----------------|---------------|-----------|-----------|-----------|
| <b>TUFT1</b>      |             |           |           |                 |               |           |           |           |
| <b>rs2337360</b>  | <b>A</b>    | <b>G</b>  |           |                 | <b>AA</b>     | <b>AG</b> | <b>GG</b> |           |
| No MIH            | 46(28.1)    | 118(71.9) | Reference |                 | 5(6.1)        | 36(43.9)  | 41(50.0)  | Reference |
| Mild              | 30(35.7)    | 54(64.3)  | 0.21      | 1.43(0.78-2.59) | 6(14.3)       | 18(42.9)  | 18(42.9)  | 0.3       |
| Severe            | 22(37.9)    | 36(62.1)  | 0.16      | 1.57(0.8-3.08)  | 3(10.3)       | 16(55.2)  | 10(34.5)  | 0.33      |
| <b>rs4970957</b>  | <b>A</b>    | <b>G</b>  |           |                 | <b>AA</b>     | <b>AG</b> | <b>GG</b> |           |
| No MIH            | 134(75.3)   | 44(24.7)  | Reference |                 | 51(57.3)      | 32(36.0)  | 6(6.7)    | Reference |
| Mild              | 66(78.6)    | 18(21.4)  | 0.56      | 1.2(0.62-2.35)  | 28(66.7)      | 10(23.8)  | 4(9.5)    | 0.36      |
| Severe            | 42(72.4)    | 16(27.6)  | 0.66      | 0.86(0.42-1.78) | 16(55.2)      | 10(34.5)  | 3(10.3)   | 0.82      |
| <b>rs3790506</b>  | <b>A</b>    | <b>G</b>  |           |                 | <b>AA</b>     | <b>AG</b> | <b>GG</b> |           |
| No MIH            | 53(29.8)    | 125(70.2) | Reference |                 | 10(11.2)      | 33(37.1)  | 46(51.7)  | Reference |
| Mild              | 25(29.8)    | 59(70.2)  | 0.99      | 1.0(0.54-1.83)  | 2(4.8)        | 21(50.0)  | 19(45.2)  | 0.25      |
| Severe            | 16(27.6)    | 42(72.4)  | 0.75      | 0.9(0.44-1.82)  | 3(10.3)       | 10(34.5)  | 16(55.2)  | 0.95      |
| <b>AMBN</b>       |             |           |           |                 |               |           |           |           |
| <b>rs4694075</b>  | <b>C</b>    | <b>T</b>  |           |                 | <b>CC</b>     | <b>CT</b> | <b>TT</b> |           |
| No MIH            | 90(50.6)    | 88(49.4)  | Reference |                 | 23(25.8)      | 44(49.4)  | 22(24.7)  | Reference |
| Mild              | 30(31.9)    | 64(68.1)  | 0.003     | 0.46(0.26-0.8)  | 10(23.8)      | 20(47.6)  | 12(28.6)  | 0.89      |
| Severe            | 31(53.4)    | 27(46.6)  | 0.7       | 1.12(0.59-2.12) | 6(20.7)       | 19(65.5)  | 4(13.8)   | 0.29      |
| <b>rs496502</b>   | <b>G</b>    | <b>T</b>  |           |                 | <b>GG</b>     | <b>GT</b> | <b>TT</b> |           |
| No MIH            | 139(78.9)   | 37(21.1)  | Reference |                 | 56(63.6)      | 27(30.7)  | 5(5.7)    | Reference |
| Mild              | 52(68.4)    | 24(31.6)  | 0.07      | 0.58(0.3-1.1)   | 18(47.4)      | 16(42.1)  | 4(10.5)   | 0.21      |
| Severe            | 51(87.9)    | 7(12.1)   | 0.13      | 1.94(0.77-5.11) | 22(75.9)      | 7(24.1)   | 0(0)      | 0.29      |
| <b>ENAM</b>       |             |           |           |                 |               |           |           |           |
| <b>rs12640848</b> | <b>A</b>    | <b>G</b>  |           |                 | <b>AA</b>     | <b>AG</b> | <b>GG</b> |           |
| No MIH            | 93(52.8)    | 83(47.2)  | Reference |                 | 25(28.4)      | 43(48.9)  | 20(22.7)  | Reference |
| Mild              | 34(40.5)    | 50(59.5)  | 0.06      | 0.61(0.35-1.06) | 5(11.9)       | 24(57.1)  | 13(31.0)  | 0.1       |
| Severe            | 26(44.8)    | 32(55.2)  | 0.29      | 0.73(0.38-1.37) | 4(13.8)       | 18(62.1)  | 7(24.1)   | 0.27      |
| <b>rs3796704</b>  | <b>A</b>    | <b>G</b>  |           |                 | <b>AA</b>     | <b>AG</b> | <b>GG</b> |           |
| No MIH            | 29(17.1)    | 141(82.9) | Reference |                 | 5(5.9)        | 19(22.4)  | 61(71.8)  | Reference |
| Mild              | 8(10.0)     | 72(90.0)  | 0.14      | 0.54(0.21-1.32) | 0(0)          | 8(20.0)   | 32(80.0)  | 0.26      |
| Severe            | 3(5.4)      | 53(94.6)  | 0.03      | 0.28(0.06-1.0)  | 0(0)          | 3(10.7)   | 25(89.3)  | 0.14      |
| <b>TFIP11</b>     |             |           |           |                 |               |           |           |           |
| <b>rs5997096</b>  | <b>C</b>    | <b>T</b>  |           |                 | <b>CC</b>     | <b>CT</b> | <b>TT</b> |           |
| No MIH            | 77(43.3)    | 101(56.7) | Reference |                 | 19(21.3)      | 39(43.8)  | 31(34.8)  | Reference |
| Mild              | 35(44.9)    | 43(55.1)  | 0.81      | 1.07(0.6-1.89)  | 9(23.1)       | 17(43.6)  | 13(33.3)  | 0.97      |
| Severe            | 19(33.9)    | 37(66.1)  | 0.21      | 0.67(0.34-1.32) | 0(0)          | 19(67.9)  | 9(32.1)   | 0.01      |
| <b>rs134136</b>   | <b>C</b>    | <b>T</b>  |           |                 | <b>CC</b>     | <b>CT</b> | <b>TT</b> |           |
| No MIH            | 117(65.7)   | 61(34.3)  | Reference |                 | 42(47.2)      | 33(37.1)  | 14(15.7)  | Reference |
| Mild              | 50(59.5)    | 34(40.5)  | 0.33      | 0.77(0.43-1.36) | 17(40.5)      | 16(38.1)  | 9(21.4)   | 0.02      |
| Severe            | 32(55.2)    | 26(44.8)  | 0.15      | 0.64(0.34-1.22) | 9(31.0)       | 14(48.3)  | 6(20.7)   | 0.31      |
| <b>AMELX</b>      |             |           |           |                 |               |           |           |           |
| <b>rs946252</b>   | <b>C</b>    | <b>T</b>  |           |                 | <b>CC</b>     | <b>CT</b> | <b>TT</b> |           |
| No MIH            | 156(87.6)   | 22(12.4)  | Reference |                 | 72(80.9)      | 12(13.5)  | 5(5.6)    | Reference |
| Mild              | 65(79.3)    | 17(20.7)  | 0.08      | 0.54(0.25-1.14) | 27(65.9)      | 11(26.8)  | 3(7.3)    | 0.15      |
| Severe            | 52(89.7)    | 6(10.3)   | 0.68      | 1.22(0.44-3.57) | 25(86.2)      | 2(6.9)    | 2(6.9)    | 0.63      |

| Subjects          | Alleles (%) |           | p-value        | OR (95% C.I.)         | Genotypes (%) |           |           | p-value |
|-------------------|-------------|-----------|----------------|-----------------------|---------------|-----------|-----------|---------|
| <b>TUFT1</b>      |             |           |                |                       |               |           |           |         |
| <b>rs2337360</b>  | <b>A</b>    | <b>G</b>  |                |                       | <b>AA</b>     | <b>AG</b> | <b>GG</b> |         |
| MIH               | 120(37.0)   | 204(63.0) | 0.03           | 0.65<br>(0.43-0.9)    | 26(16.0)      | 68(42.0)  | 68(42.0)  | 0.0001  |
| No MIH            | 73(47.4)    | 81(52.6)  |                |                       | 19(24.7)      | 35(45.5)  | 23(29.9)  |         |
| <b>rs4970957</b>  | <b>A</b>    | <b>G</b>  |                |                       | <b>AA</b>     | <b>AG</b> | <b>GG</b> |         |
| MIH               | 70(22.7)    | 238(77.3) | 3.287e-<br>023 | 0.12<br>(0.08-0.19)   | 0(0)          | 70(45.5)  | 84(54.5)  | 0.0001  |
| No MIH            | 114(69.5)   | 46(30.5)  |                |                       | 35(42.7)      | 44(53.7)  | 3(3.7)    |         |
| <b>rs3790506</b>  | <b>A</b>    | <b>G</b>  |                |                       | <b>AA</b>     | <b>AG</b> | <b>GG</b> |         |
| MIH               | 27(16.2)    | 295(83.8) | 1.64e-011      | 0.19<br>(0.11-0.33)   | 4(2.5)        | 19(11.8)  | 138(85.7) | 0.0001  |
| No MIH            | 52(32.5)    | 108(67.5) |                |                       | 12(15.0)      | 28(35.0)  | 40(50.)   |         |
| <b>AMBN</b>       |             |           |                |                       |               |           |           |         |
| <b>rs4694075</b>  | <b>C</b>    | <b>T</b>  |                |                       | <b>CC</b>     | <b>CT</b> | <b>TT</b> |         |
| MIH               | 177(51.3)   | 139(48.7) | 0.03           | 0.64<br>(0.43-0.97)   | 53(33.5)      | 71(44.9)  | 34(21.5)  | 0.02    |
| No MIH            | 109(61.9)   | 55(38.1)  |                |                       | 33(40.2)      | 43(52.4)  | 6(7.3)    |         |
| <b>rs496502</b>   | <b>G</b>    | <b>T</b>  |                |                       | <b>GG</b>     | <b>GT</b> | <b>TT</b> |         |
| MIH               | 230(86.5)   | 36(13.5)  | 0.159          | 2.58<br>(0.16-0.9)    | 100(75.2)     | 30(22.6)  | 3(2.3)    | 0.05    |
| No MIH            | 132(94.3)   | 8(5.7)    |                |                       | 62(88.6)      | 8(11.4)   | 0(0)      |         |
| <b>ENAM</b>       |             |           |                |                       |               |           |           |         |
| <b>rs12640848</b> | <b>A</b>    | <b>G</b>  |                |                       | <b>AA</b>     | <b>AG</b> | <b>GG</b> |         |
| MIH               | 158(43.9)   | 166(56.1) | 0.026          | 1.55<br>(1.01-2.35)   | 42(25.9)      | 74(45.7)  | 46(28.4)  | 0.12    |
| No MIH            | 55(33.5)    | 89(66.5)  |                |                       | 12(16.7)      | 31(43.1)  | 29(40.3)  |         |
| <b>rs3796704</b>  | <b>A</b>    | <b>G</b>  |                |                       | <b>AA</b>     | <b>AG</b> | <b>GG</b> |         |
| MIH               | 91(30.5)    | 207(69.5) | 1.22e-012      | 17.36<br>(5.98-56.78) | 19(12.8)      | 53(35.6)  | 77(51.7)  | 0.0001  |
| No MIH            | 4(24.6)     | 158(75.4) |                |                       | 0(0)          | 4(4.9)    | 77(95.1)  |         |
| <b>TFIP11</b>     |             |           |                |                       |               |           |           |         |
| <b>rs5997096</b>  | <b>C</b>    | <b>T</b>  |                |                       | <b>CC</b>     | <b>CT</b> | <b>TT</b> |         |
| MIH               | 146(44.8)   | 180(55.2) | 0.0003         | 0.49<br>(0.49-0.74)   | 30(18.4)      | 86(52.8)  | 47(28.8)  | 0.0001  |
| No MIH            | 102(62.2)   | 62(37.8)  |                |                       | 37(45.1)      | 28(34.1)  | 17(20.7)  |         |
| <b>rs134136</b>   | <b>C</b>    | <b>T</b>  |                |                       | <b>CC</b>     | <b>CT</b> | <b>TT</b> |         |
| MIH               | 190(58.7)   | 134(41.3) | 0.58           | 1.11<br>(0.60-1.35)   | 54(33.3)      | 82(50.6)  | 26(16.0)  | 0.85    |
| No MIH            | 98(61.3)    | 62(38.7)  |                |                       | 29(36.3)      | 40(50.0)  | 11(13.8)  |         |
| <b>AMELX</b>      |             |           |                |                       |               |           |           |         |
| <b>rs946252</b>   | <b>C</b>    | <b>T</b>  |                |                       | <b>CC</b>     | <b>CT</b> | <b>TT</b> |         |
| MIH               | 211(67.9)   | 115(32.1) | 0.17           | 0.7<br>(0.9-2.07)     | 85(52.1)      | 41(25.2)  | 37(22.7)  | 0.43    |
| No MIH            | 86(59.8)    | 64(40.2)  |                |                       | 33(44.0)      | 20(26.7)  | 22(29.3)  |         |
| <b>rs17878486</b> | <b>C</b>    | <b>T</b>  |                |                       | <b>CC</b>     | <b>CT</b> | <b>TT</b> |         |
| MIH               | 67(17.8)    | 241(82.2) | 0.69           | 1.13<br>(0.77-2.17)   | 18(11.7)      | 31(20.1)  | 105(68.2) | 0.15    |
| No MIH            | 28(16.0)    | 130(84.0) |                |                       | 10(12.7)      | 8(10.1)   | 61(77.2)  |         |

Note: OR (95% C.I.)= Odds ratios; 95% confidence intervals

**Supplemental Table 4. Summary of the allele and genotype frequency comparisons related to severity of MIH in the Turkish.**

| Subjects          | Alleles (%) |           | p-value   | OR (95%C.I.)      | Genotypes (%) |           |           | p-value   |
|-------------------|-------------|-----------|-----------|-------------------|---------------|-----------|-----------|-----------|
| <b>TUFT1</b>      |             |           |           |                   |               |           |           |           |
| <b>rs2337360</b>  | <b>A</b>    | <b>G</b>  |           |                   | <b>AA</b>     | <b>AG</b> | <b>GG</b> |           |
| No MIH            | 73(47.4)    | 81(52.6)  | Reference |                   | 19(24.7)      | 35(45.5)  | 23(29.9)  | Reference |
| Mild              | 12(31.6)    | 26(68.4)  | 0.08      | 0.51(0.22-1.15)   | 0(0)          | 12(63.2)  | 7(36.8)   | 0.05      |
| Severe            | 108(37.8)   | 178(62.2) | 0.05      | 0.67(0.44-1.02)   | 26(18.2)      | 56(39.2)  | 61(42.7)  | 0.16      |
| <b>rs4970957</b>  | <b>A</b>    | <b>G</b>  |           |                   | <b>AA</b>     | <b>AG</b> | <b>GG</b> |           |
| No MIH            | 114(69.5)   | 50(30.5)  | Reference |                   | 35(42.7)      | 44(53.7)  | 3(3.7)    | Reference |
| Mild              | 9(23.7)     | 29(76.3)  | 0.0001    | 0.14(0.06-0.33)   | 0(0)          | 9(47.4)   | 10(52.6)  | 0.0001    |
| Severe            | 61(22.6)    | 209(77.4) | 0.0001    | 0.13(0.08-0.2)    | 0(0)          | 61(45.2)  | 74(54.8)  | 0.0001    |
| <b>rs3790506</b>  | <b>A</b>    | <b>G</b>  |           |                   | <b>AA</b>     | <b>AG</b> | <b>GG</b> |           |
| No MIH            | 52(32.5)    | 108(67.5) | Reference |                   | 12(15.0)      | 28(35.0)  | 40(50.0)  | Reference |
| Mild              | 1(2.6)      | 37(97.4)  | 0.0002    | 0.06(0.0-0.4)     | 0(0)          | 1(5.3)    | 18(94.7)  | 0.002     |
| Severe            | 22(7.9)     | 258(92.1) | 0.00001   | 0.18(0.1-0.32)    | 4(2.8)        | 18(12.7)  | 120(84.5) | 0.0001    |
| <b>AMBN</b>       |             |           |           |                   |               |           |           |           |
| <b>rs4694075</b>  | <b>C</b>    | <b>T</b>  |           |                   | <b>CC</b>     | <b>CT</b> | <b>TT</b> |           |
| No MIH            | 109(66.5)   | 55(33.5)  | Reference |                   | 33(40.2)      | 43(52.4)  | 6(7.3)    | Reference |
| Mild              | 22(61.1)    | 14(38.9)  | 0.54      | 0.79(0.35-1.78)   | 8(44.4)       | 6(33.3)   | 4(22.2)   | 0.11      |
| Severe            | 155(55.4)   | 125(44.6) | 0.02      | 0.63(0.41-0.95)   | 45(32.1)      | 65(46.4)  | 30(21.4)  | 0.02      |
| <b>rs496502</b>   | <b>G</b>    | <b>T</b>  |           |                   | <b>GG</b>     | <b>GT</b> | <b>TT</b> |           |
| No MIH            | 132(94.3)   | 8(5.7)    | Reference |                   | 62(88.6)      | 8(11.4)   | 0(0)      | Reference |
| Mild              | 32(84.2)    | 6(15.8)   | 0.04      | 0.32(0.09-1.14)   | 14(73.7)      | 4(21.1)   | 1(5.3)    | 0.08      |
| Severe            | 198(86.8)   | 30(13.2)  | 0.02      | 0.4(0.16-0.95)    | 86(75.4)      | 26(22.8)  | 2(1.8)    | 0.07      |
| <b>ENAM</b>       |             |           |           |                   |               |           |           |           |
| <b>rs12640848</b> | <b>A</b>    | <b>G</b>  |           |                   | <b>AA</b>     | <b>AG</b> | <b>GG</b> |           |
| No MIH            | 55(38.2)    | 89(61.8)  | Reference |                   | 12(16.7)      | 31(43.1)  | 29(40.3)  | Reference |
| Mild              | 17(44.7)    | 21(55.3)  | 0.46      | 1.31(0.60-2.86)   | 3(15.8)       | 11(57.9)  | 5(26.3)   | 0.47      |
| Severe            | 141(49.3)   | 145(50.7) | 0.03      | 1.57(1.03-2.42)   | 39(27.3)      | 63(44.1)  | 41(28.7)  | 0.12      |
| <b>rs3796704</b>  | <b>A</b>    | <b>G</b>  |           |                   | <b>AA</b>     | <b>AG</b> | <b>GG</b> |           |
| No MIH            | 4(2.5)      | 158(97.5) | Reference |                   | 0(0)          | 4(4.9)    | 77(95.1)  | Reference |
| Mild              | 9(28.1)     | 23(71.9)  | 0.0001    | 15.46(3.91-65.86) | 0(0)          | 9(56.3)   | 7(43.8)   | 0.0001    |
| Severe            | 82(30.8)    | 184(69.2) | 0.0001    | 17.60(6.04-57.77) | 19(14.3)      | 44(33.1)  | 70(52.6)  | 0.0001    |
| <b>TFIP11</b>     |             |           |           |                   |               |           |           |           |
| <b>rs5997096</b>  | <b>C</b>    | <b>T</b>  |           |                   | <b>CC</b>     | <b>CT</b> | <b>TT</b> |           |
| No MIH            | 102(62.2)   | 62(37.8)  | Reference |                   | 37(45.1)      | 28(34.1)  | 17(20.7)  | Reference |
| Mild              | 17(44.7)    | 21(55.3)  | 0.05      | 0.49(0.23-1.06)   | 3(15.8)       | 11(57.9)  | 5(26.3)   | 0.05      |
| Severe            | 129(44.7)   | 159(55.3) | 0.0003    | 0.49(0.33-0.74)   | 27(18.8)      | 75(52.1)  | 42(29.2)  | 0.0001    |
| <b>rs134136</b>   | <b>C</b>    | <b>T</b>  |           |                   | <b>CC</b>     | <b>CT</b> | <b>TT</b> |           |
| No MIH            | 98(61.2)    | 62(38.8)  | Reference |                   | 29(36.3)      | 40(50.0)  | 11(13.8)  | Reference |
| Mild              | 23(60.5)    | 15(39.5)  | 0.93      | 0.97(0.44-2.13)   | 7(36.8)       | 9(47.4)   | 3(15.8)   | 0.96      |
| Severe            | 167(58.4)   | 119(41.6) | 0.55      | 0.89(0.59-1.34)   | 47(32.9)      | 73(51.0)  | 23(16.1)  | 0.83      |
| <b>AMELX</b>      |             |           |           |                   |               |           |           |           |
| <b>rs946252</b>   | <b>C</b>    | <b>T</b>  |           |                   | <b>CC</b>     | <b>CT</b> | <b>TT</b> |           |
| No MIH            | 86(57.3)    | 64(42.7)  | Reference |                   | 33(44.0)      | 20(26.7)  | 22(29.3)  | Reference |
| Mild              | 21(55.3)    | 17(44.7)  | 0.82      | 0.92(0.42-2.0)    | 8(42.1)       | 5(26.3)   | 6(31.6)   | 0.98      |
| Severe            | 190(65.9)   | 98(34.1)  | 0.07      | 1.44(0.94-2.21)   | 77(53.5)      | 36(25.0)  | 31(21.5)  | 0.34      |

| <b>rs17878486</b> | <b>C</b>  | <b>T</b>  |           |                 | <b>CC</b> | <b>CT</b> | <b>TT</b> |           |
|-------------------|-----------|-----------|-----------|-----------------|-----------|-----------|-----------|-----------|
| No MIH            | 98(61.2)  | 62(38.8)  | Reference |                 | 29(36.3)  | 40(50.0)  | 11(13.8)  | Reference |
| Mild              | 23(60.5)  | 15(39.5)  | 0.94      | 0.97(0.44-2.13) | 7(36.8)   | 9(47.4)   | 3(15.8)   | 0.96      |
| Severe            | 167(58.4) | 119(41.6) | 0.55      | 0.89(0.59-1.34) | 47(32.9)  | 73(51.0)  | 23(16.1)  | 0.83      |

Note: OR (95% C.I.)= Odds ratios; 95% confidence intervals
